# Supplementary material
Source: PubMed Central journal article supplement (PMC5849262)
Supplement: NIHMS863513-supplement-Supp_info.pdf [file NIHMS863513-supplement-Supp_info.pdf]

Supplementary Information:  
Detecting genetic association through shortest  
paths in a bi-directed graph

Masao Ueki\*, Yoshinori Kawasaki†, Gen Tamiya‡  
and for Alzheimer's Disease Neuroimaging Initiative§

November 25, 2016

---

\*uekimrsd@nifty.com. Biostatistics Center, Kurume University, 67 Asahi-Machi, Kurume, Fukuoka 830-0011, Japan.

†kawasaki@ism.ac.jp. The Institute of Statistical Mathematics, The Graduate University for Advanced Studies, 10-3 Midori-Cho, Tachikawa, Tokyo 190-8562, Japan

‡gtamiya@genetix-h.com. Tohoku Medical Megabank Organization, Tohoku University, 2-1 Seiry-Machi, Aoba-Ku, Sendai 980-8573, Japan.

§Data used in preparation of this article were obtained from the Alzheimer's Disease Neuroimaging Initiative (ADNI) database ([adni.loni.usc.edu](http://adni.loni.usc.edu)). As such, the investigators within the ADNI contributed to the design and implementation of ADNI and/or provided data but did not participate in analysis or writing of this report. A complete listing of ADNI investigators can be found at: [http://adni.loni.usc.edu/wp-content/uploads/how\\_to\\_apply/ADNI\\_Acknowledgement\\_List.pdf](http://adni.loni.usc.edu/wp-content/uploads/how_to_apply/ADNI_Acknowledgement_List.pdf)

# 1 Proof of Proposition 1

For notational simplicity, we write  $x = x_j$  and  $x_k = x_{j_k}$ . The vertexes  $0$ ,  $j$ , and  $j_k$  correspond to  $\mu$ ,  $x$ , and  $x_k$ , respectively. We use induction for the proof. For  $l = 1$ , if we consider a vector  $x_1$  between  $y$  and  $x$ ,

$$\mu^T Q_{x_1} x = \mu^T x - \mu^T P_{x_1} x = \mu^T x - \frac{(\mu^T x_1)(x^T x_1)}{\|x_1\|^2},$$

which is zero because  $\mu^T x = (\mu^T x_1)(x^T x_1) = 0$ , and hence the statement is true. Next, assume that the statement of Proposition 1 is true for any  $l$  vectors  $x_1, \dots, x_l$  placed between  $y$  and  $x$ , where  $l > 1$ . Then, for any  $A \subset \{j_1, \dots, j_l, j_{l+1}\}$  such that  $|A| \in \{0, 1, \dots, l\}$ ,  $\mu^T Q_{X_A} x = 0$ . Therefore the proposition is proved if  $\mu^T Q_{(x_1, \dots, x_l, x_{l+1})} x = 0$  holds. First, if  $x_{l+1} \subset \text{span}(x_1, \dots, x_l)$ , then  $\mu^T Q_{(x_1, \dots, x_l, x_{l+1})} x = \mu^T Q_{(x_1, \dots, x_l)} x = 0$ . Next, we consider the case where  $x_{l+1} \not\subset \text{span}(x_1, \dots, x_l)$ , and hence,  $Q_{(x_1, \dots, x_l)} x_{l+1} \neq 0$ . For such  $x_{l+1}$ , adopting the decomposition  $P_{(x_1, \dots, x_l, x_{l+1})} = P_{(x_1, \dots, x_l)} + P_{Q_{(x_1, \dots, x_l)} x_{l+1}}$  (Lemma 3, Takane and Yanai 1999) and the assumption of induction, we have

$$\begin{aligned} \mu^T Q_{(x_1, \dots, x_l, x_{l+1})} x &= -\mu^T P_{Q_{(x_1, \dots, x_l)} x_{l+1}} x \\ &= -\frac{(\mu^T Q_{(x_1, \dots, x_l)} x_{l+1})(x^T Q_{(x_1, \dots, x_l)} x_{l+1})}{\|Q_{(x_1, \dots, x_l)} x_{l+1}\|^2}. \end{aligned}$$

If we assume that the left-hand side is nonzero, then both  $\mu^T Q_{(x_1, \dots, x_l)} x_{l+1} \neq 0$  and  $x^T Q_{(x_1, \dots, x_l)} x_{l+1} \neq 0$  must be true. Reversing the assumption of induc-

tion, there is then a path between vertexes 0 and  $j_{l+1}$  directly (i.e. adjacent) or with inner vertexes being a subset of  $\{j_1, \dots, j_l\}$ , and there is a path between vertexes  $j$  and  $j_{l+1}$  directly or with inner vertexes being a subset of  $\{j_1, \dots, j_l\}$ . This means that there should be a path between vertexes  $j$  and 0 with inner vertexes comprising a subset of  $\{j_1, \dots, j_l, j_{l+1}\}$ , which contradicts the assumption of induction that there is no path between vertexes  $j$  and 0 with inner vertexes of any subsets from  $\{j_1, \dots, j_l, j_{l+1}\}$ . Therefore,  $\mu^T Q_{(x_1, \dots, x_l, x_{l+1})} x = 0$ .

## 2 Proof of Proposition 2

We use induction for the proof, where we continue to use the simplified notation as in the proof of Proposition 1. For  $l = 1$ , namely, the length of the shortest path being 1,  $\mu$  and  $x$  are not adjacent —  $\mu^T x = 0$ . If the shortest path between  $\mu$  and  $x$  has an inner vertex  $x_1$ ,

$$\mu^T Q_{x_1} x = -\frac{(\mu^T x_1)(x^T x_1)}{\|x_1\|^2}.$$

The right-hand side is nonzero due to the assumptions  $x^T x_1 \neq 0$  and  $\mu^T x_1 \neq 0$ , proving the claim that  $\mu^T Q_{x_1} x \neq 0$ .

Next, we assume that the statement of Proposition 2 is true for  $l > 1$ . Suppose then that there exists at least one path between vertexes 0 and  $j$ , and that the shortest path among them is the path with inner vertexes

$j_1 \leftrightarrow \dots \leftrightarrow j_l \leftrightarrow j_{l+1}$ . The length is  $l + 1$ . Then, because there are no paths between vertexes 0 and  $j$  whose length is less than  $l + 1$ , Proposition 1 implies that, for any  $B \subset \{j_1, \dots, j_l, j_{l+1}\}$  with  $|B| \leq l$ ,  $\mu^T Q_{X_B} x = 0$ .

Because there is no path between vertexes  $j$  and 0 with inner vertexes  $\{j_1, \dots, j_l\}$ , it follows from decomposition of the projection (Takane and Yanai 1999) used in the proof of Proposition 1 that

$$\mu^T Q_{(x_1, \dots, x_l, x_{l+1})} x = - \frac{(\mu^T Q_{(x_1, \dots, x_l)} x_{l+1})(x^T Q_{(x_1, \dots, x_l)} x_{l+1})}{\|Q_{(x_1, \dots, x_l)} x_{l+1}\|^2}. \quad (1)$$

The shortest path between vertexes 0 and  $j$  with inner vertexes  $j_1 \leftrightarrow \dots \leftrightarrow j_l \leftrightarrow j_{l+1}$  can be decomposed into two shortest paths: the path between vertexes 0 and  $j_{l+1}$ , with inner vertexes  $j_1 \leftrightarrow \dots \leftrightarrow j_l$ , and the path between  $j_{l+1}$  and  $j$ , with length zero (i.e. adjacent). Applying the assumption of induction to the former path, of which the length is  $l$ , we have  $\mu^T Q_{(x_1, \dots, x_l)} x_{l+1} \neq 0$ .

Next, if there exists  $a \in \{1, \dots, l\}$  such that  $x^T x_a \neq 0$ , it implies the existence of a path between vertexes 0 and  $j$  with inner vertexes  $j_1 \leftrightarrow \dots \leftrightarrow j_{a-1} \leftrightarrow j_a$ . Its length is  $a < l + 1$ . This contradicts the assumption of induction because the path between vertexes 0 and  $j$  with inner vertexes  $j_1 \leftrightarrow \dots \leftrightarrow j_l \leftrightarrow j_{l+1}$ , whose length is  $l + 1$ , is assumed to be the shortest. Consequently,  $x^T x_a = 0$  must hold for  $a = 1, \dots, l$ , or in vector form  $X_l^T x = 0$ , where  $X_l = (x_1, \dots, x_l)$ . Then, the residual  $Q_{X_l} x = x - P_{X_l} x = x$ , leading to  $x^T Q_{X_l} x_{l+1} = x^T x_{l+1}$ . This is nonzero as there is a path between  $j$  and  $j_{l+1}$  with length zero (i.e. adjacent). Therefore, the numerator of (1) is nonzero.

Finally, the denominator of (1),  $\|Q_{X_l x_{l+1}}\|^2$ , is no greater than  $\|x_{l+1}\|^2$ , which is never infinite. As a consequence,  $\mu^T Q_{(x_1, \dots, x_l, x_{l+1})} x \neq 0$ , completing the proof.

### 3 Conservative family-wise error rate control

Let  $M = \{1, \dots, p\}$ . We denote the sequence of indexes  $j_1 \leftrightarrow \dots \leftrightarrow j_L$  by  $(j_1, \dots, j_L)$ . For  $s = (j_1, \dots, j_L)$ , define  $|s| = L$ . Further, let  $t(s) = j_L$ , which extracts the last index, and let  $s_- = (j_1, \dots, j_{L-1})$ , i.e. the sequence where the last index is removed from  $s$ . Let

$$A(j) = \{(j_1, \dots, j_L) :$$

the path between  $j_L$  and  $j$ ,  $y \leftrightarrow j \leftrightarrow j_1 \leftrightarrow \dots \leftrightarrow j_L$ ,

is the shortest,  $j_i \in M \setminus \{j\}\}$ .

For  $k \in M$  and  $e \subset M$ , let  $T_{k|e}$  denote a test statistic for testing the null hypothesis  $\beta_k = 0$  ( $\beta_k$  is the regression coefficient of  $X_k$  in the multiple regression model  $\theta = \beta_0 + X_k \beta_k + X_e \beta_e$ ), in which  $\theta$  is a conditional mean transformed by a link function in a generalized linear model with log-likelihood function  $\ell(\theta)$ . Denote the first and second derivatives of  $\ell(\theta)$  with respect to  $\theta$  by  $\dot{\ell}(\theta)$  and  $\ddot{\ell}(\theta)$ , respectively. For  $n$  subjects, the log-likelihood function is given by  $\sum_{i=1}^n \ell(\theta_i)$ , where  $\theta_i$  is the regression model  $\theta$  for subject  $i$  as mentioned above. If  $e = \emptyset$ ,  $T_{k|e}$  reduces to the test statistic for marginal

association, which is denoted by  $T_k$ . Under the null hypothesis of no association of any SNPs with phenotype, it can be shown that  $T_{k|e} \sim N(0, 1)$  for any  $l \in e$ . Thus, the  $p$ -value is represented by  $1 - F_{\chi_1^2}(T_{k|e}^2)$ , where  $F_{\chi_1^2}$  is the cumulative distribution function of a 1 df  $\chi^2$ -distribution. Furthermore,  $T_{k|e}$  is asymptotically independent of  $T_l$ . To see this, let  $X = (X_1, X_2)$ , let  $\tilde{\beta}_1$  be the maximum likelihood estimator in the model  $X_1\beta_1$ , and let  $\hat{\beta}_2$  be the maximum likelihood estimator of  $\beta_2$  in the model  $X_1\beta_1 + X_2\beta_2$ . If both models are correct, it follows from standard asymptotic theory for generalized linear models (Dobson 2002) that

$$\begin{aligned}\tilde{\beta}_1 - \beta_1 &\approx (X_1^T W X_1)^{-1} X_1^T \dot{\ell} \\ \hat{\beta}_2 - \beta_2 &\approx E_2^T (X^T W X)^{-1} X^T \dot{\ell},\end{aligned}$$

where  $\beta_1$  and  $\beta_2$  are the true regression coefficients,  $E_2^T = (O_{p_2 \times p_1}, I_{p_2})$  is a  $p \times p_2$  matrix,  $O_{p_2 \times p_1}$  is the zero matrix whose size is shown by its subscripts, and  $\dot{\ell} = (\dot{\ell}(\theta_1), \dots, \dot{\ell}(\theta_n))^T$  and  $W = -\text{diag}\{\ddot{\ell}(\theta_1), \dots, \ddot{\ell}(\theta_n)\}$  are evaluated at the true parameter. Here, the notation ‘ $\approx$ ’ means equality ignoring terms of order  $o_p(n^{-1/2})$ . Under the null model, both models are correct and  $\beta_1 = 0$ ,

$\beta_2 = 0$ , and  $E(\dot{\ell}\dot{\ell}^T) = W$ . Consequently,

$$\begin{aligned} \text{cov}(\widehat{\beta}_2, \widetilde{\beta}_1) &\approx E_2^T (X^T W X)^{-1} X^T W X_1 (X_1^T W X_1)^{-1} \\ &= (O_{p_2 \times p_1}, I_{p_2}) (X^T W X)^{-1} X^T W X \begin{pmatrix} (X_1^T W X_1)^{-1} \\ O_{p_2 \times p_1} \end{pmatrix} \\ &= O_{p_2 \times p_1}. \end{aligned}$$

Hence,  $\widetilde{\beta}_1$  and  $\widehat{\beta}_2$  are asymptotically independent, and so are the two Wald tests based on these two regression coefficients.

Letting  $u = F_{\chi_1^2}^{-1}(1 - \alpha_1)$  and  $v_k = F_{\chi_1^2}^{-1}\{1 - \alpha_2/|A(k)|\}$ , an upper bound on the family-wise error rate is

$$\begin{aligned} &P(\exists k \in M, \exists e \in A(k) : T_k^2 > u, T_{t(e)|\{k, e_-\}}^2 > v_k) \\ &\leq \sum_{k \in M} \sum_{e \in A(k)} P(T_k^2 > u, T_{t(e)|\{k, e_-\}}^2 > v_k) \\ &= \sum_{k \in M} \sum_{e \in A(k)} P(T_k^2 > u) P(T_{t(e)|\{k, e_-\}}^2 > v_k) \\ &= \sum_{k \in M} \sum_{e \in A(k)} P\{1 - F_{\chi_1^2}(T_k^2) < \alpha_1\} P[\{1 - F_{\chi_1^2}(T_{t(e)|\{k, e_-\}}^2)\} |A(k)| < \alpha_2] \\ &= \sum_{k \in M} \sum_{e \in A(k)} \alpha_1 \frac{\alpha_2}{|A(k)|} \\ &= p\alpha_1\alpha_2. \end{aligned}$$

The equality in the third line is due to the asymptotic independence between  $T_k$  and  $T_{t(e)|\{k, e_-\}}$ . Letting  $\alpha$  be the nominal family-wise error rate (such as

5%), we can control the family-wise error rate at  $\alpha$  by taking  $\alpha_2 = \alpha/(\alpha_1 p)$  for any  $\alpha_1$ . The expected number of indexes satisfying  $T_k^2 > u$  is  $p\alpha_1$  if all SNPs have no effect. For example, if we take  $\alpha_1 = 10^{-3}$  when  $p = 10^6$ , the expected number is 1,000, which is the expected cardinality of  $H$  in step 2 in Section 2.2 in the main text.

## 4 Marginal association testing under a bivariate model

Consider two SNPs, SNP<sub>1</sub> (A/a) and SNP<sub>2</sub> (B/b), whose joint distribution of allele frequencies is as in the following table.

Table 1: Allele frequency in the general population

| SNP <sub>1</sub> / SNP <sub>2</sub> | B        | b        | Total    |
|-------------------------------------|----------|----------|----------|
| A                                   | $P_{11}$ | $P_{12}$ | $P_{1.}$ |
| a                                   | $P_{21}$ | $P_{22}$ | $P_{2.}$ |
| Total                               | $P_{.1}$ | $P_{.2}$ | 1        |

Now we assume that a quantitative phenotype is generated from the following bivariate linear regression model,  $M_{true}$  say,

$$y = \beta_0 1 + \beta_1 x_1 + \beta_2 x_2 + \epsilon, \quad \epsilon \sim N(0, \sigma^2 I),$$

where  $x_1 = I(\text{aA}) + 2I(\text{aa})$  and  $x_2 = I(\text{bB}) + 2I(\text{bb})$ .

The effect of  $x_1$  can be tested under the true model  $M_{true}$ ; call this Method I. On the other hand, we also consider the situation where the effect of  $x_1$  is



Table 2: Conditional expectation of  $y$  given two SNP genotypes for true model  $M_{true}$

| SNP <sub>1</sub> / SNP <sub>2</sub> | BB                   | bB                             | bb                              |
|-------------------------------------|----------------------|--------------------------------|---------------------------------|
| AA                                  | $\beta_0$            | $\beta_0 + \beta_2$            | $\beta_0 + 2\beta_2$            |
| aA                                  | $\beta_0 + \beta_1$  | $\beta_0 + \beta_1 + \beta_2$  | $\beta_0 + \beta_1 + 2\beta_2$  |
| aa                                  | $\beta_0 + 2\beta_1$ | $\beta_0 + 2\beta_1 + \beta_2$ | $\beta_0 + 2\beta_1 + 2\beta_2$ |

tested by a marginal linear regression model,  $M_1$  (i.e.  $x_2$  is omitted),

$$y = \beta_{1,0}1 + \beta_{1,1}x_1 + \epsilon,$$

which is exactly the standard marginal association test in SNP-GWAS; call this Method II.

We compare the statistical power of Methods I and II. The tests we consider are based on the Wald test, in which the corresponding test statistics  $\hat{t}_{1,I}$  and  $\hat{t}_{1,II}$  are given in (4) and (5), respectively. Let  $\rho_{12} = \text{cor}(x_1, x_2)$  and  $v_j = \text{var}(x_j)$  for  $j = 1, 2$ . In the above setting,  $v_1 = 2P_1.P_2$ . and  $v_2 = 2P_1.P_2$ . Further, assuming Hardy–Weinberg equilibrium,  $\rho_{12} = r$ , where  $r$  is the Pearson correlation between alleles at SNP<sub>1</sub> and SNP<sub>2</sub> (Wellek and Ziegler 2009). Let the scaled predictor be  $x'_j = x_j/\sqrt{v_j}$ , giving the corresponding regression coefficient  $\beta'_j = \beta_j\sqrt{v_j}$ . We assume that  $\sigma^2 \gg |\beta'_j|$  for typical GWAS data. Then,

$$E\hat{t}_{1,I} \approx \frac{\sqrt{n}}{\sigma} \sqrt{1 - \rho_{12}^2} \beta'_1 \quad (2)$$

$$E\hat{t}_{1,II} \approx \frac{\sqrt{n}}{\sigma} (\beta'_1 + \beta'_2 \rho_{12}). \quad (3)$$

The derivation is given in the following subsection. The above equations imply that Methods I and II have equivalent power when  $\beta_2 = 0$  or when  $\rho_{12} = 0$ , because then  $\widehat{t}_{1,I} \approx \widehat{t}_{1,II}$ . The condition  $\beta_2 = 0$  implies that  $x_2$  has no effect on phenotype. The condition  $\rho_{12} = 0$  implies that  $x_1$  and  $x_2$  are uncorrelated, or not in LD. Hence, even though the underlying model is the bivariate model  $M_{true}$ , the marginal association test under model  $M_1$  works when  $\beta_2 = 0$  or  $\rho_{12} = 0$ . Next, we consider the case where  $\beta_2 = 0$  and  $\rho_{12} \neq 0$ , which is more common in SNP-GWAS. Then, we have from (2) and (3) that  $E\widehat{t}_{1,I} \approx \frac{\sqrt{n}}{\sigma} \sqrt{1 - \rho_{12}^2} \beta'_1$  and  $E\widehat{t}_{1,II} \approx \frac{\sqrt{n}}{\sigma} \beta'_1$ . Thus,  $\widehat{t}_{1,I} < \widehat{t}_{1,II}^2$  due to  $\rho_{12} \neq 0$ , implying that Method II outperforms Method I. This is also supported by our power simulation scenario 1.

If  $\beta'_1 \approx -\beta'_2 \rho_{12}$ , then no marginal effect of  $x_1$  appears, because  $E\widehat{t}_{1,II} \approx 0$ . Given that  $\beta'_1 \approx -\beta'_2 \rho_{12}$ ,  $\beta'_1 \neq 0$  implies that both  $\beta'_2 \neq 0$  and  $\rho_{12} \neq 0$ . In this case, Method I outperforms Method II if  $\rho_{12}^2 < 1$ , because  $E\widehat{t}_{1,I}$  is approximately nonzero. The above argument implies that, for the effect of SNP<sub>1</sub> ( $\beta_1 \neq 0$ ) to be hidden by SNP<sub>2</sub>, the effect of SNP<sub>2</sub> ( $\beta_2$ ) is nonzero and the two SNPs are in LD ( $\rho_{12} \neq 0$ ). Although  $x_1$  has no marginal effect,  $x_2$  has a nonzero marginal effect because

$$\beta'_2 + \beta'_1 \rho_{12} \approx \beta'_2 (1 - \rho_{12}^2) \neq 0.$$

Finally, we describe particular situations where Method I outperforms Method II. First, suppose that  $b = \beta'_1 = \beta'_2 > 0$ . Then,  $\widehat{t}_{1,I}^2 > \widehat{t}_{1,II}$  if

$(1 - \rho_{12}^2)/(1 + \rho_{12}) > 1$ , or

$$\rho_{12} < 0.$$

Hence, when  $x_1$  and  $x_2$  have the same effect, the negative correlation leads to higher power of Method I compared to that of Method II. Next, suppose that  $b = \beta_1' = -\beta_2' > 0$ . Then,  $\hat{t}_{1,I}^2 > \hat{t}_{1,II}^2$  if  $(1 - \rho_{12}^2)/(1 - \rho_{12}) > 1$ , or

$$\rho_{12} > 0.$$

Hence, when  $x_1$  and  $x_2$  have opposite effects, the positive correlation leads to higher power of Method I compared to that of Method II.

#### 4.1 Derivation of (2) and (3)

Let  $\tilde{x}_1 = Q_1 x_1$  and  $\tilde{x}_2 = Q_1 x_2$ . The least squares estimator of  $\beta_1$  and its variance estimator under  $M_{true}$  are given by

$$\hat{\beta}_{1,1} = (Q_{\tilde{x}_2} \tilde{x}_1)^T y / \|Q_{\tilde{x}_2} \tilde{x}_1\|^2 \quad \text{and} \quad \hat{\sigma}_I^2 / \|Q_{\tilde{x}_2} \tilde{x}_1\|^2,$$

where  $\hat{\sigma}_I^2 = \|Q_{(\tilde{x}_1, \tilde{x}_2)} y\|^2 / n$ , and the  $t$  statistic is given by

$$\hat{t}_{1,I} = \hat{\sigma}_I^{-1} (Q_{\tilde{x}_2} \tilde{x}_1)^T y / \|Q_{\tilde{x}_2} \tilde{x}_1\|. \quad (4)$$

On the other hand, the least squares estimator of  $\beta_{1,1}$  and its variance estimator under  $M_1$  are given by

$$\widehat{\beta}_{1,1} = \widetilde{x}_1^T y / \|\widetilde{x}_1\|^2 \quad \text{and} \quad \widehat{\sigma}_{II}^2 / \|\widetilde{x}_1\|^2,$$

where  $\widehat{\sigma}_{II}^2 = \|Q_{\widetilde{x}_1} y\|^2 / n$ , and the  $t$  statistic is given by

$$\widehat{t}_{1,II} = \widehat{\sigma}_{II}^{-1} \widetilde{x}_1^T y / \|\widetilde{x}_1\|. \quad (5)$$

Both  $\widehat{t}_{1,I}$  and  $\widehat{t}_{1,II}$  are designed to be asymptotically  $N(0, 1)$  under the null hypothesis. Therefore, for a given nominal level  $\alpha$ , the effect of  $x_1$  is detected if

$$\widehat{t}_{1,I}^2 > q$$

with Method I, and if

$$\widehat{t}_{1,II}^2 > q$$

with Method II. Here  $q$  is the  $(1 - \alpha)$ th quantile of the  $\chi_1^2$  distribution. Consequently, statistical power is determined by the noncentrality parameters  $E\widehat{t}_{1,I}$  and  $E\widehat{t}_{1,II}$  for Methods I and II, respectively.

We now assess behavior of the above  $t$  statistics as  $n \rightarrow \infty$ . For large  $n$ ,

$$E\{(Q_{\widetilde{x}_2} \widetilde{x}_1)^T y\} / n = \beta_1 \|Q_{\widetilde{x}_2} \widetilde{x}_1\|^2 / n,$$

and

$$\begin{aligned}
\|Q_{\tilde{x}_2}\tilde{x}_1\|^2/n &\approx \|\tilde{x}_1\|^2/n - (\tilde{x}_1^T\tilde{x}_2/n)^2/(\|\tilde{x}_2\|^2/n) \\
&\approx v_1 - \text{cov}(x_1, x_2)^2/v_2 \\
&= v_1(1 - \rho_{12}^2).
\end{aligned}$$

Also,  $\hat{\sigma}_I^2 \approx \sigma^2$ . Therefore, under the true model  $M_{true}$ ,

$$E\hat{t}_{1,I} \approx \frac{\beta_1\|Q_{\tilde{x}_2}\tilde{x}_1\|}{\sigma} \approx \frac{\sqrt{nv_1(1 - \rho_{12}^2)}\beta_1}{\sigma}. \quad (6)$$

On the other hand, for large  $n$ ,

$$\begin{aligned}
E(\tilde{x}_1^T y)/n &= \tilde{x}_1^T(\beta_1 x_1 + \beta_2 x_2)/n \\
&= (\beta_1\|\tilde{x}_1\|^2 + \beta_2\tilde{x}_1^T\tilde{x}_2)/n \\
&\approx \beta_1 v_1 + \beta_2 \text{cov}(x_1, x_2) \\
&= \sqrt{v_1}(\sqrt{v_1}\beta_1 + \beta_2\sqrt{v_2}\rho_{12}).
\end{aligned}$$

Also,

$$\begin{aligned}
E(\hat{\sigma}_{II}^2) &= \sigma^2 + \beta_2^2\|Q_{\tilde{x}_1}\tilde{x}_2\|^2/n \\
&\approx \sigma^2 + \beta_2^2 v_2(1 - \rho_{12}^2).
\end{aligned}$$

Thus,

$$E\hat{t}_{1,II} \approx \frac{\sqrt{n}(\sqrt{v_1}\beta_1 + \beta_2\sqrt{v_2}\rho_{12})}{\sqrt{\sigma^2 + \beta_2^2 v_2(1 - \rho_{12}^2)}}. \quad (7)$$

## 5 Additional tables

| $a_{\min}$ | $\alpha_1$ | Quantitative |      |      |       | Binary |      |      |       |
|------------|------------|--------------|------|------|-------|--------|------|------|-------|
|            |            | MePL         | MaPL | MeNP | MaNP  | MePL   | MaPL | MeNP | MaNP  |
| 0.1        | 0.01       | 4            | 9    | 369  | 10341 | 4      | 9    | 364  | 12051 |
| 0.1        | 0.001      | 4            | 7    | 354  | 2757  | 4      | 7    | 354  | 3082  |
| 0.1        | 0.0001     | 3            | 4    | 309  | 544   | 3      | 5    | 309  | 646   |
| 0.1        | 0.00001    | 1            | 1    | 84   | 93    | 1      | 1    | 76   | 85    |
| 0.3        | 0.01       | 6            | 12   | 344  | 27020 | 6      | 12   | 304  | 24464 |
| 0.3        | 0.001      | 5            | 9    | 434  | 7643  | 5      | 9    | 289  | 4396  |
| 0.3        | 0.0001     | 4            | 5    | 253  | 730   | 4      | 5    | 210  | 511   |
| 0.3        | 0.00001    | 1            | 1    | 42   | 62    | 1      | 1    | 160  | 199   |
| 0.5        | 0.01       | 4            | 8    | 45   | 1498  | 4      | 9    | 47   | 2293  |
| 0.5        | 0.001      | 4            | 6    | 48   | 489   | 4      | 6    | 46   | 544   |
| 0.5        | 0.0001     | 3            | 4    | 33   | 68    | 3      | 4    | 46   | 95    |
| 0.5        | 0.00001    | 1            | 1    | 11   | 13    | 1      | 1    | 15   | 26    |
| 0.7        | 0.01       | 4            | 7    | 12   | 441   | 4      | 7    | 12   | 455   |
| 0.7        | 0.001      | 3            | 5    | 11   | 117   | 3      | 5    | 12   | 134   |
| 0.7        | 0.0001     | 3            | 3    | 10   | 37    | 3      | 3    | 8    | 23    |
| 0.7        | 0.00001    | 0            | 0    | 1    | 2     | 0      | 0    | 2    | 6     |

Table 3: Summary of the shortest paths in all bi-directed graphs in our proposed method from quantitative- and binary-phenotype type I error simulations with 16 combinations of  $(a_{\min}, \alpha_1) \in \{0.1, 0.3, 0.5, 0.7\} \times \{0.01, 0.001, 0.0001, 0.00001\}$ . MePL, mean shortest path length; MaPL, maximum shortest path length; MeNP, mean number of shortest paths; MaNP, maximum number of shortest paths.

| Scenario   |            | 1 |     | 2 |     | 3 |     | 4 |     | 5 |     | 6 |     |
|------------|------------|---|-----|---|-----|---|-----|---|-----|---|-----|---|-----|
| $a_{\min}$ | $\alpha_1$ | 1 | 1.5 | 1 | 1.5 | 1 | 1.5 | 1 | 1.5 | 1 | 1.5 | 1 | 1.5 |
| 0.1        | 0.01       | 3 | 3   | 3 | 3   | 4 | 3   | 3 | 3   | 3 | 3   | 4 | 4   |
| 0.1        | 0.001      | 3 | 3   | 3 | 3   | 3 | 3   | 3 | 3   | 3 | 3   | 2 | 3   |
| 0.1        | 0.0001     | 2 | 3   | 2 | 3   | 1 | 3   | 2 | 3   | 1 | 3   | 1 | 2   |
| 0.1        | 0.00001    | 1 | 3   | 1 | 3   | 1 | 2   | 1 | 3   | 1 | 2   | 0 | 1   |
| 0.3        | 0.01       | 5 | 5   | 5 | 5   | 5 | 5   | 5 | 5   | 5 | 5   | 5 | 6   |
| 0.3        | 0.001      | 4 | 5   | 4 | 5   | 4 | 5   | 4 | 5   | 4 | 5   | 3 | 5   |
| 0.3        | 0.0001     | 3 | 5   | 3 | 5   | 2 | 4   | 3 | 5   | 2 | 4   | 1 | 3   |
| 0.3        | 0.00001    | 2 | 4   | 1 | 4   | 1 | 3   | 2 | 5   | 1 | 3   | 0 | 2   |
| 0.5        | 0.01       | 4 | 4   | 4 | 4   | 4 | 4   | 4 | 4   | 3 | 4   | 3 | 4   |
| 0.5        | 0.001      | 3 | 4   | 3 | 4   | 3 | 4   | 3 | 4   | 3 | 3   | 2 | 3   |
| 0.5        | 0.0001     | 2 | 4   | 2 | 4   | 1 | 3   | 2 | 4   | 1 | 3   | 1 | 2   |
| 0.5        | 0.00001    | 1 | 4   | 1 | 3   | 1 | 3   | 2 | 3   | 0 | 2   | 0 | 1   |
| 0.7        | 0.01       | 3 | 3   | 3 | 3   | 3 | 3   | 3 | 3   | 3 | 3   | 3 | 3   |
| 0.7        | 0.001      | 2 | 3   | 3 | 3   | 2 | 3   | 3 | 3   | 2 | 3   | 2 | 3   |
| 0.7        | 0.0001     | 2 | 3   | 2 | 3   | 1 | 3   | 2 | 3   | 1 | 3   | 0 | 1   |
| 0.7        | 0.00001    | 1 | 3   | 1 | 3   | 1 | 2   | 1 | 3   | 0 | 1   | 0 | 1   |

Table 4: Mean shortest path length in all bi-directed graphs in our proposed method from quantitative power simulations with 16 combinations of  $(a_{\min}, \alpha_1) \in \{0.1, 0.3, 0.5, 0.7\} \times \{0.01, 0.001, 0.0001, 0.00001\}$  under six scenarios. The two columns in each scenario indicate results for  $m = 1$  and  $m = 1.5$ , respectively.

| Scenario   |            | 1 |     | 2 |     | 3 |     | 4 |     | 5 |     | 6 |     |
|------------|------------|---|-----|---|-----|---|-----|---|-----|---|-----|---|-----|
| $a_{\min}$ | $\alpha_1$ | 1 | 1.5 | 1 | 1.5 | 1 | 1.5 | 1 | 1.5 | 1 | 1.5 | 1 | 1.5 |
| 0.1        | 0.01       | 6 | 6   | 6 | 6   | 6 | 6   | 6 | 6   | 6 | 6   | 6 | 6   |
| 0.1        | 0.001      | 4 | 5   | 4 | 5   | 3 | 5   | 4 | 5   | 4 | 5   | 3 | 4   |
| 0.1        | 0.0001     | 2 | 4   | 2 | 4   | 2 | 4   | 3 | 4   | 2 | 4   | 1 | 3   |
| 0.1        | 0.00001    | 2 | 4   | 1 | 4   | 1 | 3   | 2 | 4   | 1 | 3   | 0 | 2   |
| 0.3        | 0.01       | 8 | 8   | 8 | 8   | 8 | 8   | 8 | 9   | 8 | 8   | 8 | 8   |
| 0.3        | 0.001      | 6 | 7   | 6 | 7   | 5 | 7   | 6 | 7   | 5 | 7   | 4 | 7   |
| 0.3        | 0.0001     | 4 | 7   | 3 | 6   | 2 | 5   | 5 | 7   | 2 | 5   | 2 | 4   |
| 0.3        | 0.00001    | 2 | 6   | 2 | 5   | 1 | 4   | 3 | 7   | 1 | 4   | 1 | 2   |
| 0.5        | 0.01       | 6 | 6   | 6 | 6   | 6 | 6   | 6 | 6   | 5 | 6   | 5 | 5   |
| 0.5        | 0.001      | 4 | 5   | 4 | 5   | 4 | 5   | 4 | 6   | 3 | 5   | 3 | 4   |
| 0.5        | 0.0001     | 3 | 5   | 3 | 5   | 2 | 4   | 3 | 5   | 1 | 4   | 1 | 3   |
| 0.5        | 0.00001    | 2 | 5   | 1 | 4   | 1 | 3   | 2 | 5   | 1 | 3   | 0 | 2   |
| 0.7        | 0.01       | 4 | 5   | 4 | 4   | 4 | 4   | 4 | 5   | 4 | 5   | 4 | 4   |
| 0.7        | 0.001      | 3 | 4   | 3 | 4   | 3 | 4   | 3 | 4   | 3 | 4   | 2 | 3   |
| 0.7        | 0.0001     | 2 | 4   | 2 | 4   | 1 | 3   | 2 | 4   | 1 | 3   | 0 | 2   |
| 0.7        | 0.00001    | 1 | 4   | 1 | 3   | 1 | 3   | 1 | 4   | 0 | 2   | 0 | 1   |

Table 5: Maximum shortest path length in all bi-directed graphs in our proposed method from quantitative power simulations with 16 combinations of  $(a_{\min}, \alpha_1) \in \{0.1, 0.3, 0.5, 0.7\} \times \{0.01, 0.001, 0.0001, 0.00001\}$  under six scenarios. The two columns in each scenario indicate results for  $m = 1$  and  $m = 1.5$ , respectively.



| Scenario   |            | 1    |      | 2    |      | 3    |      | 4    |      | 5    |      | 6   |      |
|------------|------------|------|------|------|------|------|------|------|------|------|------|-----|------|
| $a_{\min}$ | $\alpha_1$ | 1    | 1.5  | 1    | 1.5  | 1    | 1.5  | 1    | 1.5  | 1    | 1.5  | 1   | 1.5  |
| 0.1        | 0.01       | 668  | 652  | 723  | 702  | 745  | 732  | 670  | 667  | 591  | 633  | 705 | 604  |
| 0.1        | 0.001      | 568  | 685  | 628  | 768  | 647  | 780  | 591  | 652  | 539  | 582  | 413 | 591  |
| 0.1        | 0.0001     | 424  | 720  | 464  | 761  | 437  | 756  | 431  | 663  | 301  | 551  | 229 | 419  |
| 0.1        | 0.00001    | 288  | 713  | 310  | 723  | 273  | 698  | 305  | 672  | 192  | 456  | 53  | 310  |
| 0.3        | 0.01       | 1391 | 1326 | 1408 | 1214 | 1340 | 1349 | 1485 | 1378 | 1148 | 1076 | 944 | 957  |
| 0.3        | 0.001      | 1096 | 1275 | 1349 | 1422 | 1221 | 1567 | 1084 | 1367 | 626  | 922  | 913 | 1077 |
| 0.3        | 0.0001     | 914  | 1410 | 907  | 1647 | 636  | 1659 | 884  | 1410 | 239  | 644  | 253 | 566  |
| 0.3        | 0.00001    | 698  | 1418 | 459  | 1694 | 310  | 1510 | 697  | 1443 | 70   | 405  | 127 | 472  |
| 0.5        | 0.01       | 58   | 58   | 57   | 62   | 51   | 63   | 50   | 55   | 33   | 43   | 24  | 27   |
| 0.5        | 0.001      | 63   | 77   | 67   | 80   | 49   | 72   | 46   | 62   | 26   | 35   | 15  | 27   |
| 0.5        | 0.0001     | 46   | 83   | 50   | 79   | 34   | 72   | 39   | 63   | 15   | 28   | 7   | 23   |
| 0.5        | 0.00001    | 48   | 92   | 29   | 77   | 21   | 69   | 34   | 60   | 3    | 19   | 2   | 14   |
| 0.7        | 0.01       | 6    | 5    | 5    | 5    | 5    | 6    | 5    | 5    | 7    | 10   | 4   | 4    |
| 0.7        | 0.001      | 5    | 6    | 6    | 6    | 4    | 5    | 4    | 5    | 5    | 9    | 2   | 3    |
| 0.7        | 0.0001     | 4    | 7    | 4    | 6    | 3    | 6    | 4    | 5    | 3    | 6    | 0   | 2    |
| 0.7        | 0.00001    | 4    | 8    | 3    | 7    | 2    | 6    | 3    | 5    | 1    | 4    | 0   | 1    |

Table 6: Mean number of shortest paths in all bi-directed graphs in our proposed method from quantitative power simulations with 16 combinations of  $(a_{\min}, \alpha_1) \in \{0.1, 0.3, 0.5, 0.7\} \times \{0.01, 0.001, 0.0001, 0.00001\}$  under six scenarios. The two columns in each scenario indicate results for  $m = 1$  and  $m = 1.5$ , respectively.

| Scenario   |            | 1     |       | 2     |       | 3     |       | 4     |       | 5     |       | 6    |      |
|------------|------------|-------|-------|-------|-------|-------|-------|-------|-------|-------|-------|------|------|
| $a_{\min}$ | $\alpha_1$ | 1     | 1.5   | 1     | 1.5   | 1     | 1.5   | 1     | 1.5   | 1     | 1.5   | 1    | 1.5  |
| 0.1        | 0.01       | 1938  | 2284  | 2545  | 2848  | 2919  | 3199  | 2661  | 3167  | 2188  | 2550  | 2463 | 2532 |
| 0.1        | 0.001      | 875   | 1186  | 1122  | 1761  | 1122  | 1835  | 1004  | 1425  | 981   | 1523  | 624  | 1106 |
| 0.1        | 0.0001     | 600   | 1137  | 700   | 1318  | 610   | 1373  | 658   | 1193  | 442   | 1176  | 275  | 625  |
| 0.1        | 0.00001    | 378   | 1052  | 433   | 1151  | 396   | 1094  | 383   | 1073  | 275   | 792   | 58   | 387  |
| 0.3        | 0.01       | 10773 | 16026 | 13154 | 14446 | 12913 | 14325 | 15026 | 18962 | 11583 | 13034 | 5821 | 7019 |
| 0.3        | 0.001      | 5084  | 6793  | 8551  | 11061 | 7926  | 9807  | 4970  | 10540 | 1509  | 8420  | 1802 | 2742 |
| 0.3        | 0.0001     | 3403  | 6319  | 3128  | 9517  | 1191  | 8797  | 3423  | 6138  | 385   | 1825  | 495  | 1066 |
| 0.3        | 0.00001    | 2542  | 5700  | 829   | 8706  | 556   | 7799  | 1324  | 5427  | 105   | 850   | 233  | 730  |
| 0.5        | 0.01       | 452   | 537   | 368   | 565   | 282   | 453   | 321   | 447   | 201   | 336   | 106  | 158  |
| 0.5        | 0.001      | 272   | 472   | 244   | 406   | 167   | 300   | 191   | 353   | 71    | 174   | 29   | 79   |
| 0.5        | 0.0001     | 136   | 433   | 114   | 318   | 79    | 247   | 110   | 286   | 37    | 113   | 11   | 50   |
| 0.5        | 0.00001    | 91    | 413   | 66    | 252   | 49    | 174   | 74    | 226   | 5     | 53    | 3    | 20   |
| 0.7        | 0.01       | 30    | 33    | 31    | 38    | 28    | 38    | 30    | 40    | 42    | 65    | 22   | 29   |
| 0.7        | 0.001      | 15    | 25    | 17    | 26    | 13    | 21    | 15    | 25    | 18    | 37    | 4    | 11   |
| 0.7        | 0.0001     | 11    | 23    | 9     | 20    | 7     | 18    | 10    | 20    | 7     | 24    | 1    | 4    |
| 0.7        | 0.00001    | 8     | 20    | 6     | 16    | 4     | 14    | 6     | 18    | 3     | 13    | 0    | 1    |

Table 7: Maximum number of shortest paths in all bi-directed graphs in our proposed method from quantitative power simulations with 16 combinations of  $(a_{\min}, \alpha_1) \in \{0.1, 0.3, 0.5, 0.7\} \times \{0.01, 0.001, 0.0001, 0.00001\}$  under six scenarios. The two columns in each scenario indicate results for  $m = 1$  and  $m = 1.5$ , respectively.

| Scenario   |            | 1 |     | 2 |     | 3 |     | 4 |     | 5 |     | 6 |     |
|------------|------------|---|-----|---|-----|---|-----|---|-----|---|-----|---|-----|
| $a_{\min}$ | $\alpha_1$ | 1 | 1.5 | 1 | 1.5 | 1 | 1.5 | 1 | 1.5 | 1 | 1.5 | 1 | 1.5 |
| 0.1        | 0.01       | 3 | 3   | 3 | 4   | 4 | 4   | 3 | 4   | 4 | 4   | 4 | 4   |
| 0.1        | 0.001      | 3 | 3   | 3 | 3   | 3 | 3   | 3 | 3   | 3 | 4   | 3 | 4   |
| 0.1        | 0.0001     | 2 | 3   | 2 | 3   | 2 | 3   | 3 | 3   | 2 | 4   | 2 | 3   |
| 0.1        | 0.00001    | 1 | 3   | 1 | 3   | 1 | 4   | 2 | 3   | 1 | 3   | 1 | 3   |
| 0.3        | 0.01       | 5 | 6   | 5 | 5   | 5 | 5   | 5 | 5   | 5 | 5   | 5 | 5   |
| 0.3        | 0.001      | 5 | 5   | 5 | 5   | 5 | 5   | 5 | 5   | 4 | 4   | 4 | 5   |
| 0.3        | 0.0001     | 4 | 5   | 3 | 5   | 4 | 5   | 4 | 5   | 2 | 4   | 2 | 5   |
| 0.3        | 0.00001    | 2 | 5   | 2 | 5   | 2 | 5   | 3 | 5   | 1 | 3   | 1 | 5   |
| 0.5        | 0.01       | 4 | 4   | 4 | 4   | 4 | 4   | 4 | 4   | 3 | 3   | 4 | 4   |
| 0.5        | 0.001      | 3 | 4   | 4 | 4   | 3 | 4   | 4 | 4   | 3 | 3   | 3 | 4   |
| 0.5        | 0.0001     | 3 | 4   | 2 | 4   | 2 | 4   | 3 | 4   | 1 | 3   | 2 | 4   |
| 0.5        | 0.00001    | 2 | 4   | 1 | 4   | 1 | 4   | 2 | 4   | 0 | 2   | 1 | 4   |
| 0.7        | 0.01       | 3 | 3   | 3 | 3   | 3 | 4   | 3 | 3   | 4 | 4   | 3 | 3   |
| 0.7        | 0.001      | 3 | 3   | 3 | 3   | 3 | 3   | 3 | 3   | 3 | 4   | 2 | 3   |
| 0.7        | 0.0001     | 2 | 3   | 2 | 3   | 2 | 3   | 2 | 3   | 1 | 4   | 0 | 3   |
| 0.7        | 0.00001    | 1 | 3   | 1 | 3   | 1 | 3   | 1 | 3   | 0 | 3   | 0 | 2   |

Table 8: Mean shortest path length in all bi-directed graphs in our proposed method from binary power simulations with 16 combinations of  $(a_{\min}, \alpha_1) \in \{0.1, 0.3, 0.5, 0.7\} \times \{0.01, 0.001, 0.0001, 0.00001\}$  under six scenarios. The two columns in each scenario indicate results for  $m = 1$  and  $m = 1.5$ , respectively.

| Scenario   |            | 1 |     | 2 |     | 3 |     | 4 |     | 5 |     | 6 |     |
|------------|------------|---|-----|---|-----|---|-----|---|-----|---|-----|---|-----|
| $a_{\min}$ | $\alpha_1$ | 1 | 1.5 | 1 | 1.5 | 1 | 1.5 | 1 | 1.5 | 1 | 1.5 | 1 | 1.5 |
| 0.1        | 0.01       | 6 | 6   | 6 | 6   | 6 | 6   | 6 | 6   | 6 | 6   | 6 | 6   |
| 0.1        | 0.001      | 4 | 5   | 4 | 5   | 5 | 6   | 4 | 5   | 4 | 5   | 3 | 5   |
| 0.1        | 0.0001     | 3 | 4   | 3 | 5   | 3 | 5   | 3 | 4   | 2 | 5   | 2 | 4   |
| 0.1        | 0.00001    | 2 | 4   | 2 | 4   | 2 | 5   | 2 | 4   | 1 | 4   | 1 | 4   |
| 0.3        | 0.01       | 8 | 9   | 8 | 8   | 8 | 8   | 8 | 8   | 7 | 8   | 8 | 8   |
| 0.3        | 0.001      | 6 | 8   | 6 | 7   | 6 | 7   | 7 | 8   | 5 | 7   | 5 | 7   |
| 0.3        | 0.0001     | 5 | 8   | 4 | 6   | 4 | 6   | 5 | 7   | 2 | 6   | 3 | 7   |
| 0.3        | 0.00001    | 3 | 7   | 2 | 6   | 2 | 6   | 4 | 7   | 1 | 5   | 1 | 6   |
| 0.5        | 0.01       | 6 | 6   | 6 | 6   | 5 | 6   | 6 | 6   | 5 | 6   | 5 | 6   |
| 0.5        | 0.001      | 5 | 6   | 5 | 6   | 4 | 6   | 5 | 6   | 3 | 5   | 4 | 6   |
| 0.5        | 0.0001     | 4 | 6   | 3 | 5   | 3 | 6   | 4 | 6   | 2 | 4   | 2 | 5   |
| 0.5        | 0.00001    | 2 | 5   | 2 | 5   | 1 | 5   | 3 | 5   | 1 | 3   | 1 | 5   |
| 0.7        | 0.01       | 4 | 4   | 4 | 5   | 4 | 6   | 4 | 5   | 5 | 6   | 4 | 5   |
| 0.7        | 0.001      | 3 | 4   | 4 | 5   | 4 | 5   | 3 | 4   | 4 | 5   | 2 | 4   |
| 0.7        | 0.0001     | 2 | 4   | 2 | 5   | 2 | 4   | 2 | 4   | 1 | 5   | 0 | 3   |
| 0.7        | 0.00001    | 2 | 4   | 1 | 4   | 1 | 4   | 1 | 3   | 0 | 4   | 0 | 2   |

Table 9: Maximum shortest path length in all bi-directed graphs in our proposed method from binary power simulations with 16 combinations of  $(a_{\min}, \alpha_1) \in \{0.1, 0.3, 0.5, 0.7\} \times \{0.01, 0.001, 0.0001, 0.00001\}$  under six scenarios. The two columns in each scenario indicate results for  $m = 1$  and  $m = 1.5$ , respectively.

| Scenario   |            | 1    |      | 2    |      | 3    |      | 4    |      | 5    |      | 6    |     |
|------------|------------|------|------|------|------|------|------|------|------|------|------|------|-----|
| $a_{\min}$ | $\alpha_1$ | 1    | 1.5  | 1    | 1.5  | 1    | 1.5  | 1    | 1.5  | 1    | 1.5  | 1    | 1.5 |
| 0.1        | 0.01       | 707  | 667  | 918  | 848  | 980  | 828  | 717  | 763  | 873  | 812  | 767  | 778 |
| 0.1        | 0.001      | 642  | 702  | 831  | 933  | 1322 | 935  | 649  | 763  | 861  | 990  | 543  | 811 |
| 0.1        | 0.0001     | 515  | 732  | 594  | 973  | 1094 | 1113 | 520  | 741  | 494  | 1124 | 375  | 801 |
| 0.1        | 0.00001    | 363  | 732  | 366  | 976  | 647  | 1302 | 372  | 704  | 306  | 1082 | 132  | 786 |
| 0.3        | 0.01       | 1677 | 2275 | 1610 | 1419 | 1578 | 1381 | 1247 | 1284 | 1300 | 811  | 1035 | 814 |
| 0.3        | 0.001      | 2204 | 1980 | 2383 | 1805 | 2803 | 1609 | 1476 | 1518 | 480  | 609  | 750  | 741 |
| 0.3        | 0.0001     | 2144 | 2117 | 2203 | 2115 | 2946 | 2025 | 1413 | 1655 | 157  | 438  | 398  | 857 |
| 0.3        | 0.00001    | 1655 | 1933 | 1918 | 2886 | 1525 | 2477 | 825  | 1671 | 56   | 312  | 203  | 874 |
| 0.5        | 0.01       | 50   | 56   | 59   | 58   | 40   | 79   | 46   | 41   | 30   | 36   | 24   | 27  |
| 0.5        | 0.001      | 60   | 69   | 61   | 74   | 47   | 104  | 59   | 53   | 24   | 33   | 24   | 31  |
| 0.5        | 0.0001     | 51   | 84   | 47   | 79   | 39   | 102  | 50   | 62   | 8    | 29   | 16   | 36  |
| 0.5        | 0.00001    | 39   | 86   | 30   | 88   | 19   | 86   | 48   | 64   | 3    | 21   | 7    | 35  |
| 0.7        | 0.01       | 6    | 6    | 9    | 7    | 8    | 7    | 6    | 5    | 12   | 9    | 5    | 6   |
| 0.7        | 0.001      | 5    | 5    | 6    | 6    | 7    | 6    | 4    | 4    | 9    | 9    | 2    | 3   |
| 0.7        | 0.0001     | 5    | 6    | 5    | 7    | 7    | 6    | 4    | 4    | 2    | 8    | 1    | 1   |
| 0.7        | 0.00001    | 4    | 7    | 4    | 9    | 4    | 7    | 3    | 3    | 1    | 6    | 0    | 1   |

Table 10: Mean number of shortest paths in all bi-directed graphs in our proposed method from binary power simulations with 16 combinations of  $(a_{\min}, \alpha_1) \in \{0.1, 0.3, 0.5, 0.7\} \times \{0.01, 0.001, 0.0001, 0.00001\}$  under six scenarios. The two columns in each scenario indicate results for  $m = 1$  and  $m = 1.5$ , respectively.

| Scenario   |            | 1     |       | 2     |       | 3     |       | 4    |       | 5    |      | 6    |      |
|------------|------------|-------|-------|-------|-------|-------|-------|------|-------|------|------|------|------|
| $a_{\min}$ | $\alpha_1$ | 1     | 1.5   | 1     | 1.5   | 1     | 1.5   | 1    | 1.5   | 1    | 1.5  | 1    | 1.5  |
| 0.1        | 0.01       | 2399  | 3234  | 3122  | 4411  | 4641  | 4637  | 2991 | 3743  | 4044 | 4359 | 3216 | 4587 |
| 0.1        | 0.001      | 984   | 1254  | 1574  | 3404  | 2818  | 3356  | 1382 | 2141  | 1741 | 3956 | 769  | 2816 |
| 0.1        | 0.0001     | 690   | 1131  | 903   | 2537  | 1664  | 3267  | 711  | 1552  | 675  | 3241 | 442  | 1645 |
| 0.1        | 0.00001    | 456   | 1066  | 496   | 1984  | 859   | 3209  | 456  | 1219  | 334  | 2587 | 156  | 1171 |
| 0.3        | 0.01       | 11189 | 36501 | 13347 | 14343 | 13241 | 16601 | 9531 | 13540 | 8523 | 8740 | 7330 | 7978 |
| 0.3        | 0.001      | 7205  | 13790 | 8102  | 12944 | 9171  | 12247 | 6201 | 12024 | 1081 | 2908 | 2404 | 2247 |
| 0.3        | 0.0001     | 4758  | 10673 | 4823  | 11421 | 5688  | 12220 | 4525 | 10216 | 251  | 1476 | 579  | 1734 |
| 0.3        | 0.00001    | 3001  | 7010  | 3390  | 10525 | 2748  | 11380 | 2169 | 9152  | 70   | 830  | 295  | 1455 |
| 0.5        | 0.01       | 335   | 485   | 407   | 399   | 301   | 687   | 409  | 329   | 144  | 312  | 114  | 181  |
| 0.5        | 0.001      | 256   | 434   | 199   | 357   | 157   | 624   | 290  | 303   | 61   | 176  | 57   | 112  |
| 0.5        | 0.0001     | 170   | 405   | 123   | 304   | 84    | 463   | 185  | 278   | 14   | 107  | 28   | 92   |
| 0.5        | 0.00001    | 113   | 359   | 59    | 258   | 35    | 321   | 113  | 243   | 4    | 59   | 13   | 77   |
| 0.7        | 0.01       | 34    | 49    | 48    | 56    | 50    | 54    | 38   | 38    | 63   | 70   | 28   | 43   |
| 0.7        | 0.001      | 18    | 29    | 20    | 41    | 21    | 40    | 16   | 25    | 27   | 48   | 7    | 15   |
| 0.7        | 0.0001     | 12    | 25    | 14    | 37    | 13    | 35    | 10   | 21    | 5    | 33   | 1    | 5    |
| 0.7        | 0.00001    | 8     | 20    | 9     | 33    | 6     | 33    | 5    | 19    | 1    | 23   | 0    | 2    |

Table 11: Maximum number of shortest paths in all bi-directed graphs in our proposed method from binary power simulations with 16 combinations of  $(a_{\min}, \alpha_1) \in \{0.1, 0.3, 0.5, 0.7\} \times \{0.01, 0.001, 0.0001, 0.00001\}$  under six scenarios. The two columns in each scenario indicate results for  $m = 1$  and  $m = 1.5$ , respectively.

Table 12: Significant shortest paths at  $a_{\min} = 0.1$  and  $\alpha_1 = 0.01$ .  $P_{\text{marg}}$ , marginal association p-value.  $P_{\text{mult}}$ , multiple regression p-value applied to each path. SNPs in each path are ordered so that the first SNP is adjacent to the phenotype and the last SNP is tested for association.

| Significant path | CHR | SNP       | BP       | $P_{\text{marg}}$ | $P_{\text{mult}}$ |
|------------------|-----|-----------|----------|-------------------|-------------------|
| 1                | 19  | rs440277  | 50053064 | 3.8e-03           | 4.5e-01           |
| 1                | 19  | rs387976  | 50070900 | 8.8e-02           | 4.1e-02           |
| 1                | 19  | rs157580  | 50087106 | 5.2e-05           | 2.0e-11           |
| 1                | 19  | rs8106922 | 50093506 | 1.3e-04           | 1.3e-08           |
| 2                | 19  | rs440277  | 50053064 | 3.8e-03           | 1.7e-01           |
| 2                | 19  | rs387976  | 50070900 | 8.8e-02           | 4.3e-02           |
| 2                | 19  | rs157580  | 50087106 | 5.2e-05           | 1.3e-11           |
| 2                | 19  | rs405509  | 50100676 | 7.7e-04           | 1.6e-08           |
| 3                | 19  | rs157580  | 50087106 | 5.2e-05           | 1.9e-01           |
| 3                | 19  | rs2075650 | 50087459 | 1.9e-11           | 2.7e-08           |
| 4                | 19  | rs157580  | 50087106 | 5.2e-05           | 9.2e-11           |
| 4                | 19  | rs8106922 | 50093506 | 1.3e-04           | 3.9e-10           |
| 5                | 19  | rs157580  | 50087106 | 5.2e-05           | 1.2e-10           |
| 5                | 19  | rs405509  | 50100676 | 7.7e-04           | 2.5e-09           |
| 6                | 19  | rs157580  | 50087106 | 5.2e-05           | 8.2e-01           |
| 6                | 19  | rs429358  | 50103781 | 9.5e-23           | 6.7e-19           |
| 7                | 19  | rs2075650 | 50087459 | 1.9e-11           | 5.3e-01           |
| 7                | 19  | rs429358  | 50103781 | 9.5e-23           | 6.6e-13           |
| 8                | 19  | rs8106922 | 50093506 | 1.3e-04           | 3.9e-10           |
| 8                | 19  | rs157580  | 50087106 | 5.2e-05           | 9.2e-11           |
| 9                | 19  | rs8106922 | 50093506 | 1.3e-04           | 9.7e-02           |
| 9                | 19  | rs2075650 | 50087459 | 1.9e-11           | 8.6e-09           |
| 10               | 19  | rs8106922 | 50093506 | 1.3e-04           | 6.2e-01           |
| 10               | 19  | rs429358  | 50103781 | 9.5e-23           | 1.4e-19           |
| 11               | 19  | rs8106922 | 50093506 | 1.3e-04           | 1.2e-01           |
| 11               | 19  | rs405509  | 50100676 | 7.7e-04           | 1.6e-02           |
| 11               | 19  | rs439401  | 50106291 | 1.3e-05           | 2.3e-09           |
| 12               | 19  | rs405509  | 50100676 | 7.7e-04           | 2.5e-09           |
| 12               | 19  | rs157580  | 50087106 | 5.2e-05           | 1.2e-10           |
| 13               | 19  | rs405509  | 50100676 | 7.7e-04           | 7.8e-01           |
| 13               | 19  | rs2075650 | 50087459 | 1.9e-11           | 6.3e-09           |
| 14               | 19  | rs405509  | 50100676 | 7.7e-04           | 5.7e-01           |
| 14               | 19  | rs439401  | 50106291 | 1.3e-05           | 8.5e-01           |
| 14               | 19  | rs429358  | 50103781 | 9.5e-23           | 3.8e-12           |
| 15               | 19  | rs405509  | 50100676 | 7.7e-04           | 1.6e-01           |
| 15               | 19  | rs8106922 | 50093506 | 1.3e-04           | 1.6e-01           |
| 15               | 19  | rs429358  | 50103781 | 9.5e-23           | 6.9e-20           |
| 16               | 19  | rs405509  | 50100676 | 7.7e-04           | 3.8e-01           |
| 16               | 19  | rs2075650 | 50087459 | 1.9e-11           | 3.6e-01           |
| 16               | 19  | rs429358  | 50103781 | 9.5e-23           | 4.8e-13           |
| 17               | 19  | rs405509  | 50100676 | 7.7e-04           | 6.6e-01           |
| 17               | 19  | rs157580  | 50087106 | 5.2e-05           | 8.8e-01           |
| 17               | 19  | rs429358  | 50103781 | 9.5e-23           | 4.4e-11           |
| 18               | 19  | rs405509  | 50100676 | 7.7e-04           | 6.1e-08           |
| 18               | 19  | rs439401  | 50106291 | 1.3e-05           | 1.2e-09           |
| 19               | 19  | rs439401  | 50106291 | 1.3e-05           | 2.6e-02           |
| 19               | 19  | rs2075650 | 50087459 | 1.9e-11           | 2.7e-08           |
| 20               | 19  | rs439401  | 50106291 | 1.3e-05           | 5.8e-02           |
| 20               | 19  | rs157580  | 50087106 | 5.2e-05           | 1.1e-04           |
| 20               | 19  | rs8106922 | 50093506 | 1.3e-04           | 1.1e-09           |
| 21               | 19  | rs439401  | 50106291 | 1.3e-05           | 1.2e-09           |
| 21               | 19  | rs405509  | 50100676 | 7.7e-04           | 6.1e-08           |
| 22               | 19  | rs439401  | 50106291 | 1.3e-05           | 8.4e-01           |
| 22               | 19  | rs429358  | 50103781 | 9.5e-23           | 1.5e-18           |

Table 13: Significant shortest paths at  $a_{\min} = 0.1$  and  $\alpha_1 = 0.001$ .  $P_{\text{marg}}$ , marginal association p-value.  $P_{\text{mult}}$ , multiple regression p-value applied to each path. SNPs in each path are ordered so that the first SNP is adjacent to the phenotype and the last SNP is tested for association.

| Significant path | CHR | SNP        | BP       | $P_{\text{marg}}$ | $P_{\text{mult}}$ |
|------------------|-----|------------|----------|-------------------|-------------------|
| 1                | 5   | rs2963337  | 8988632  | 1.5e-04           | 4.0e-08           |
| 1                | 5   | rs2963345  | 8962508  | 3.2e-03           | 7.0e-03           |
| 1                | 5   | rs6870451  | 8991885  | 9.3e-02           | 8.6e-07           |
| 2                | 5   | rs2963337  | 8988632  | 1.5e-04           | 3.8e-08           |
| 2                | 5   | rs2963345  | 8962508  | 3.2e-03           | 7.9e-03           |
| 2                | 5   | rs11955429 | 8994715  | 7.8e-02           | 9.9e-07           |
| 3                | 19  | rs157580   | 50087106 | 5.2e-05           | 1.9e-01           |
| 3                | 19  | rs2075650  | 50087459 | 1.9e-11           | 2.7e-08           |
| 4                | 19  | rs157580   | 50087106 | 5.2e-05           | 9.2e-11           |
| 4                | 19  | rs8106922  | 50093506 | 1.3e-04           | 3.9e-10           |
| 5                | 19  | rs157580   | 50087106 | 5.2e-05           | 1.2e-10           |
| 5                | 19  | rs405509   | 50100676 | 7.7e-04           | 2.5e-09           |
| 6                | 19  | rs157580   | 50087106 | 5.2e-05           | 8.2e-01           |
| 6                | 19  | rs429358   | 50103781 | 9.5e-23           | 6.7e-19           |
| 7                | 19  | rs2075650  | 50087459 | 1.9e-11           | 5.3e-01           |
| 7                | 19  | rs429358   | 50103781 | 9.5e-23           | 6.6e-13           |
| 8                | 19  | rs8106922  | 50093506 | 1.3e-04           | 3.9e-10           |
| 8                | 19  | rs157580   | 50087106 | 5.2e-05           | 9.2e-11           |
| 9                | 19  | rs8106922  | 50093506 | 1.3e-04           | 9.7e-02           |
| 9                | 19  | rs2075650  | 50087459 | 1.9e-11           | 8.6e-09           |
| 10               | 19  | rs8106922  | 50093506 | 1.3e-04           | 6.2e-01           |
| 10               | 19  | rs429358   | 50103781 | 9.5e-23           | 1.4e-19           |
| 11               | 19  | rs8106922  | 50093506 | 1.3e-04           | 1.2e-01           |
| 11               | 19  | rs405509   | 50100676 | 7.7e-04           | 1.6e-02           |
| 11               | 19  | rs439401   | 50106291 | 1.3e-05           | 2.3e-09           |
| 12               | 19  | rs405509   | 50100676 | 7.7e-04           | 2.5e-09           |
| 12               | 19  | rs157580   | 50087106 | 5.2e-05           | 1.2e-10           |
| 13               | 19  | rs405509   | 50100676 | 7.7e-04           | 7.8e-01           |
| 13               | 19  | rs2075650  | 50087459 | 1.9e-11           | 6.3e-09           |
| 14               | 19  | rs405509   | 50100676 | 7.7e-04           | 5.7e-01           |
| 14               | 19  | rs439401   | 50106291 | 1.3e-05           | 8.5e-01           |
| 14               | 19  | rs429358   | 50103781 | 9.5e-23           | 3.8e-12           |
| 15               | 19  | rs405509   | 50100676 | 7.7e-04           | 1.6e-01           |
| 15               | 19  | rs8106922  | 50093506 | 1.3e-04           | 1.6e-01           |
| 15               | 19  | rs429358   | 50103781 | 9.5e-23           | 6.9e-20           |
| 16               | 19  | rs405509   | 50100676 | 7.7e-04           | 3.8e-01           |
| 16               | 19  | rs2075650  | 50087459 | 1.9e-11           | 3.6e-01           |
| 16               | 19  | rs429358   | 50103781 | 9.5e-23           | 4.8e-13           |
| 17               | 19  | rs405509   | 50100676 | 7.7e-04           | 6.6e-01           |
| 17               | 19  | rs157580   | 50087106 | 5.2e-05           | 8.8e-01           |
| 17               | 19  | rs429358   | 50103781 | 9.5e-23           | 4.4e-11           |
| 18               | 19  | rs405509   | 50100676 | 7.7e-04           | 6.1e-08           |
| 18               | 19  | rs439401   | 50106291 | 1.3e-05           | 1.2e-09           |
| 19               | 19  | rs439401   | 50106291 | 1.3e-05           | 2.6e-02           |
| 19               | 19  | rs2075650  | 50087459 | 1.9e-11           | 2.7e-08           |
| 20               | 19  | rs439401   | 50106291 | 1.3e-05           | 5.8e-02           |
| 20               | 19  | rs157580   | 50087106 | 5.2e-05           | 1.1e-04           |
| 20               | 19  | rs8106922  | 50093506 | 1.3e-04           | 1.1e-09           |
| 21               | 19  | rs439401   | 50106291 | 1.3e-05           | 1.2e-09           |
| 21               | 19  | rs405509   | 50100676 | 7.7e-04           | 6.1e-08           |
| 22               | 19  | rs439401   | 50106291 | 1.3e-05           | 8.4e-01           |
| 22               | 19  | rs429358   | 50103781 | 9.5e-23           | 1.5e-18           |

Table 14: Significant shortest paths at  $a_{\min} = 0.1$  and  $\alpha_1 = 0.0001$ .  $P_{\text{marg}}$ , marginal association p-value.  $P_{\text{mult}}$ , multiple regression p-value applied to each path. SNPs in each path are ordered so that the first SNP is adjacent to the phenotype and the last SNP is tested for association.

| Significant path | CHR | SNP       | BP       | $P_{\text{marg}}$ | $P_{\text{mult}}$ |
|------------------|-----|-----------|----------|-------------------|-------------------|
| 1                | 19  | rs157580  | 50087106 | 5.2e-05           | 1.9e-01           |
| 1                | 19  | rs2075650 | 50087459 | 1.9e-11           | 2.7e-08           |
| 2                | 19  | rs157580  | 50087106 | 5.2e-05           | 9.2e-11           |
| 2                | 19  | rs8106922 | 50093506 | 1.3e-04           | 3.9e-10           |
| 3                | 19  | rs157580  | 50087106 | 5.2e-05           | 1.2e-10           |
| 3                | 19  | rs405509  | 50100676 | 7.7e-04           | 2.5e-09           |
| 4                | 19  | rs157580  | 50087106 | 5.2e-05           | 8.2e-01           |
| 4                | 19  | rs429358  | 50103781 | 9.5e-23           | 6.7e-19           |
| 5                | 19  | rs2075650 | 50087459 | 1.9e-11           | 5.3e-01           |
| 5                | 19  | rs429358  | 50103781 | 9.5e-23           | 6.6e-13           |
| 6                | 19  | rs439401  | 50106291 | 1.3e-05           | 2.6e-02           |
| 6                | 19  | rs2075650 | 50087459 | 1.9e-11           | 2.7e-08           |
| 7                | 19  | rs439401  | 50106291 | 1.3e-05           | 5.8e-02           |
| 7                | 19  | rs157580  | 50087106 | 5.2e-05           | 1.1e-04           |
| 7                | 19  | rs8106922 | 50093506 | 1.3e-04           | 1.1e-09           |
| 8                | 19  | rs439401  | 50106291 | 1.3e-05           | 1.2e-09           |
| 8                | 19  | rs405509  | 50100676 | 7.7e-04           | 6.1e-08           |
| 9                | 19  | rs439401  | 50106291 | 1.3e-05           | 8.4e-01           |
| 9                | 19  | rs429358  | 50103781 | 9.5e-23           | 1.5e-18           |

Table 15: Significant shortest paths at  $a_{\min} = 0.1$  and  $\alpha_1 = 0.00001$ .  $P_{\text{marg}}$ , marginal association p-value.  $P_{\text{mult}}$ , multiple regression p-value applied to each path. SNPs in each path are ordered so that the first SNP is adjacent to the phenotype and the last SNP is tested for association.

| Significant path | CHR | SNP        | BP       | $P_{\text{marg}}$ | $P_{\text{mult}}$ |
|------------------|-----|------------|----------|-------------------|-------------------|
| 1                | 19  | rs2075650  | 50087459 | 1.9e-11           | 1.3e-08           |
| 1                | 19  | rs157580   | 50087106 | 5.2e-05           | 1.3e-02           |
| 1                | 19  | rs12610605 | 50062678 | 2.3e-01           | 4.7e-04           |
| 2                | 19  | rs2075650  | 50087459 | 1.9e-11           | 5.3e-01           |
| 2                | 19  | rs429358   | 50103781 | 9.5e-23           | 6.6e-13           |

Table 16: Significant shortest paths at  $a_{\min} = 0.3$  and  $\alpha_1 = 0.01$ ,  $a_{\min} = 0.3$  and  $\alpha_1 = 0.0001$ , and  $a_{\min} = 0.5$  and  $\alpha_1 = 0.01, 0.001, 0.0001, 0.00001$ .  $P_{\text{marg}}$ , marginal association p-value.  $P_{\text{mult}}$ , multiple regression p-value applied to each path. SNPs in each path are ordered so that the first SNP is adjacent to the phenotype and the last SNP is tested for association.

| Significant path | CHR | SNP       | BP       | $P_{\text{marg}}$ | $P_{\text{mult}}$ |
|------------------|-----|-----------|----------|-------------------|-------------------|
| 1                | 19  | rs2075650 | 50087459 | 1.9e-11           | 5.3e-01           |
| 1                | 19  | rs429358  | 50103781 | 9.5e-23           | 6.6e-13           |

Table 17: 6. Significant shortest paths at  $a_{\min} = 0.3$  and  $\alpha_1 = 0.001$ .  $P_{\text{marg}}$ , marginal association p-value.  $P_{\text{mult}}$ , multiple regression p-value applied to each path. SNPs in each path are ordered so that the first SNP is adjacent to the phenotype and the last SNP is tested for association.

| Significant path | CHR | SNP        | BP       | $P_{\text{marg}}$ | $P_{\text{mult}}$ |
|------------------|-----|------------|----------|-------------------|-------------------|
| 1                | 5   | rs2963327  | 8987159  | 2.0e-04           | 8.1e-08           |
| 1                | 5   | rs2963345  | 8962508  | 3.2e-03           | 7.1e-03           |
| 1                | 5   | rs6870451  | 8991885  | 9.3e-02           | 1.4e-06           |
| 2                | 5   | rs2963327  | 8987159  | 2.0e-04           | 7.8e-08           |
| 2                | 5   | rs2963344  | 8962428  | 3.7e-03           | 1.1e-02           |
| 2                | 5   | rs6870451  | 8991885  | 9.3e-02           | 2.0e-06           |
| 3                | 5   | rs2963327  | 8987159  | 2.0e-04           | 7.7e-08           |
| 3                | 5   | rs2963345  | 8962508  | 3.2e-03           | 8.0e-03           |
| 3                | 5   | rs11955429 | 8994715  | 7.8e-02           | 1.6e-06           |
| 4                | 5   | rs2963327  | 8987159  | 2.0e-04           | 7.0e-08           |
| 4                | 5   | rs2963344  | 8962428  | 3.7e-03           | 1.3e-02           |
| 4                | 5   | rs11955429 | 8994715  | 7.8e-02           | 2.3e-06           |
| 5                | 5   | rs2963337  | 8988632  | 1.5e-04           | 4.0e-08           |
| 5                | 5   | rs2963345  | 8962508  | 3.2e-03           | 7.0e-03           |
| 5                | 5   | rs6870451  | 8991885  | 9.3e-02           | 8.6e-07           |
| 6                | 5   | rs2963337  | 8988632  | 1.5e-04           | 3.9e-08           |
| 6                | 5   | rs2963344  | 8962428  | 3.7e-03           | 1.1e-02           |
| 6                | 5   | rs6870451  | 8991885  | 9.3e-02           | 1.3e-06           |
| 7                | 5   | rs2963337  | 8988632  | 1.5e-04           | 3.8e-08           |
| 7                | 5   | rs2963345  | 8962508  | 3.2e-03           | 7.9e-03           |
| 7                | 5   | rs11955429 | 8994715  | 7.8e-02           | 9.9e-07           |
| 8                | 5   | rs2963337  | 8988632  | 1.5e-04           | 3.5e-08           |
| 8                | 5   | rs2963344  | 8962428  | 3.7e-03           | 1.2e-02           |
| 8                | 5   | rs11955429 | 8994715  | 7.8e-02           | 1.4e-06           |
| 9                | 19  | rs2075650  | 50087459 | 1.9e-11           | 5.3e-01           |
| 9                | 19  | rs429358   | 50103781 | 9.5e-23           | 6.6e-13           |

Table 18: Results from lasso. SNPs that were included in the optimal model chosen by AIC.  $P_{marg}$ , marginal association p-value.  $P_{puma}$ , PUMA p-value.

| CHR | SNP        | BP        | $P_{marg}$ | $P_{puma}$ |
|-----|------------|-----------|------------|------------|
| 1   | rs4970843  | 109688714 | 5.6e-06    | 8.3e-05    |
| 1   | rs6427160  | 167158805 | 4.3e-06    | 6.5e-03    |
| 1   | rs4434815  | 244153230 | 1.4e-05    | 2.1e-06    |
| 2   | rs4072374  | 3564846   | 3.2e-05    | 1.3e-04    |
| 2   | rs10929604 | 9782998   | 8.1e-06    | 4.8e-03    |
| 2   | rs6751810  | 19110421  | 7.1e-05    | 1.2e-01    |
| 2   | rs2346567  | 19126150  | 6.0e-05    | 6.1e-01    |
| 2   | rs4953672  | 42953942  | 9.0e-06    | 1.2e-04    |
| 2   | rs2883782  | 171142071 | 1.5e-05    | 2.9e-02    |
| 2   | rs2854711  | 208720112 | 3.5e-04    | 9.6e-04    |
| 3   | rs7641243  | 11855760  | 3.3e-05    | 1.3e-07    |
| 3   | rs9821223  | 36858373  | 6.8e-04    | 6.4e-05    |
| 3   | rs10510985 | 69746561  | 2.9e-05    | 1.2e-02    |
| 4   | rs6534996  | 135217173 | 9.5e-07    | 3.4e-06    |
| 4   | rs11726692 | 142139487 | 1.2e-06    | 3.4e-02    |
| 5   | rs12657303 | 172075156 | 7.6e-06    | 2.1e-05    |
| 6   | rs2305955  | 21308261  | 2.9e-05    | 7.6e-06    |
| 6   | rs7767652  | 55114756  | 2.8e-05    | 4.8e-03    |
| 7   | rs799449   | 44751222  | 1.1e-04    | 2.2e-04    |
| 7   | rs757839   | 70213204  | 5.5e-05    | 9.9e-05    |
| 7   | rs1006091  | 122330026 | 1.6e-04    | 1.9e-03    |
| 8   | rs1155490  | 69262212  | 7.3e-05    | 1.5e-04    |
| 8   | rs769031   | 70513720  | 4.7e-05    | 7.8e-05    |
| 8   | rs10110185 | 131548563 | 8.1e-04    | 1.1e-05    |
| 9   | rs2518112  | 107327881 | 6.3e-05    | 1.9e-04    |
| 9   | rs4978345  | 110122092 | 5.9e-05    | 6.4e-03    |
| 10  | rs11598825 | 7668437   | 1.3e-04    | 2.4e-04    |
| 11  | rs10892831 | 121763566 | 2.9e-05    | 3.9e-03    |
| 12  | rs7137643  | 113775994 | 6.3e-05    | 7.9e-05    |
| 13  | rs6491232  | 27328216  | 1.1e-04    | 4.7e-03    |
| 14  | rs2693693  | 98745939  | 6.0e-05    | 2.3e-04    |
| 15  | rs11072670 | 75828844  | 5.9e-04    | 9.7e-06    |
| 15  | rs1077541  | 78885162  | 7.4e-05    | 6.0e-04    |
| 18  | rs8182439  | 70026851  | 1.0e-04    | 8.7e-03    |
| 19  | rs4807567  | 4229502   | 9.5e-05    | 1.8e-03    |
| 19  | rs429358   | 50103781  | 9.5e-23    | 2.5e-25    |
| 20  | rs6130775  | 43206582  | 1.9e-04    | 7.9e-02    |
| 22  | rs739049   | 48094617  | 4.7e-05    | 4.1e-03    |



## References

- [1] Takane Y, Yanai H (1999) On oblique projectors. *Lin Algeb Appl* **289**, 297–310.
- [2] Dobson A (2002) *An Introduction to Generalized Linear Models, 2nd Ed.* Chapman & Hall, London.
- [3] Wellek S, Ziegler A (2009) A genotype-based approach to assessing the association between single nucleotide polymorphisms. *Hum Hered* **67**, 128–139.
